# Supplementary material for: The Genetic Diversity and Population Structure of Different Geographical Populations of Bottle Gourd (Lagenaria siceraria) Accessions Based on Genotyping-by-Sequencing
Source: MDPI journal article supplement (doi:10.3390/agronomy11081677), 2021-08-23
Supplement: s1 [file s1]

**Table S1.** Accession code, origin, region, location, and geographical coordinates of 25 bottle gourd accessions used at the present study.

| Accession code | Country of origin                                   | Province/Region | Location            | Lat S         | Long E        |
|----------------|-----------------------------------------------------|-----------------|---------------------|---------------|---------------|
| CLS-001        | South Africa                                        | Limpopo         | Ga-Phasa            | 23°40'57.30'' | 29°15'57-30'' |
| CLS-002        | South Africa                                        | Limpopo         | Kgohloane           | 23°47'39.76'' | 29°22'13.45'' |
| CLS-003        | South Africa                                        | Limpopo         | NI                  | NI            | NI            |
| CLS-004        | South Africa                                        | Limpopo         | Kgohloane           | 23°47'39.76'' | 29°22'13.45'' |
| CLS-005        | South Africa                                        | Limpopo         | NI                  | NI            | NI            |
| CLS-006        | South Africa                                        | Limpopo         | Kgohloane           | 23°47'39.76'' | 29°22'13.45'' |
| CLS-007        | South Africa                                        | Limpopo         | Kgohloane           | 23°47'39.76'' | 29°22'13.45'' |
| CLS-008        | South Africa                                        | Limpopo         | Kgohloane           | 23°47'39.76'' | 29°22'13.45'' |
| CLS-009        | South Africa                                        | Limpopo         | Ga-Rapitsi          | 23°35'48.37'' | 29°06'25.08'' |
| CLS-010        | South Africa                                        | Limpopo         | Ga-Phasa            | 23°40'57.30'' | 29°15'57.30'' |
| CLS-011        | South Africa                                        | Limpopo         | Moletjie-Mabokelele | 23°45'14.69'' | 29°17'36.6''  |
| CLS-012        | South Africa                                        | Limpopo         | Moletjie-Mabokelele | 23°45'14.69'' | 29°17'36.6''  |
| CLS-013        | South Africa                                        | Limpopo         | Moletjie-Mabokelele | 23°45'14.69'' | 29°17'36.6''  |
| CLS-014        | South Africa                                        | Limpopo         | Moletjie-Mabokelele | 23°45'14.69'' | 29°17'36.6''  |
| CLS-015        | South Africa                                        | KwaZulu-Natal   | La Lucia            | 29°45'19.98'' | 31°04'33.41'' |
| CLS-016        | Brazil                                              | Minas Gerais    | Carangola           | NI            | NI            |
| CLS-017        | Brazil                                              | Minas Gerais    | Diamantina          | 18°24'13.40'' | 43°37'01.2''  |
| CLS-019        | India <i>L. siceraria</i> var. <i>hispida</i>       | NI              | NI                  | NI            | NI            |
| CLS-020        | Japan <i>L. siceraria</i> var. <i>siceraria</i>     | NI              | NI                  | NI            | NI            |
| CLS-021        | Philippines <i>L. siceraria</i> var. <i>hispida</i> | NI              | NI                  | NI            | NI            |
| CLS-022        | South Korea <i>L. siceraria</i> var. <i>hispida</i> | NI              | NI                  | NI            | NI            |
| CLS-023        | Chile                                               | Coquimbo        | Illapel             | 31°35'29.58'' | 70°45'67''    |
| CLS-024        | Chile                                               | Chépica         | O'Higgins           | 35°26'42.00'' | 72°01'28.40'' |
| CLS-025        | Chile                                               | Osorno          | Loncoche            | 39°22'31.44'' | 72°36'28.69'' |
| CLS-029        | Chile- Aurora                                       | Commercial      | NI                  | NI            | NI            |

NI: No information.

The accessions of South Africa showed differentiation in fruit characteristics as previously informed by Mashilo et al. (2017)
